# Supplementary material
Source: Springer Nature journal article supplement (https://www.springermedizin.de/resource/supplementary/12990_2013_590_MOESM4_ESM.pdf/9613580)

# Anxiety-like behavior

## A Sham control

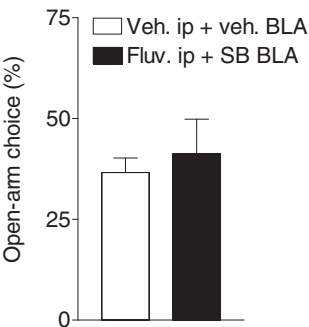

## B Arthritis

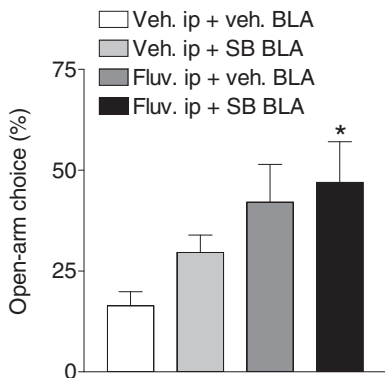

# Locomotor activity

## C

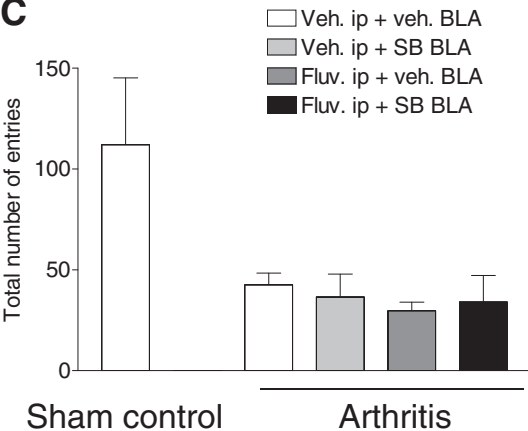

Supplement: MOESM4 [file 9613580]
